# Supplementary material
Source: Springer Nature journal article supplement (https://www.springermedizin.de/resource/supplementary/12958_2009_519_MOESM3_ESM.pdf/9568200)

# Thymus

A

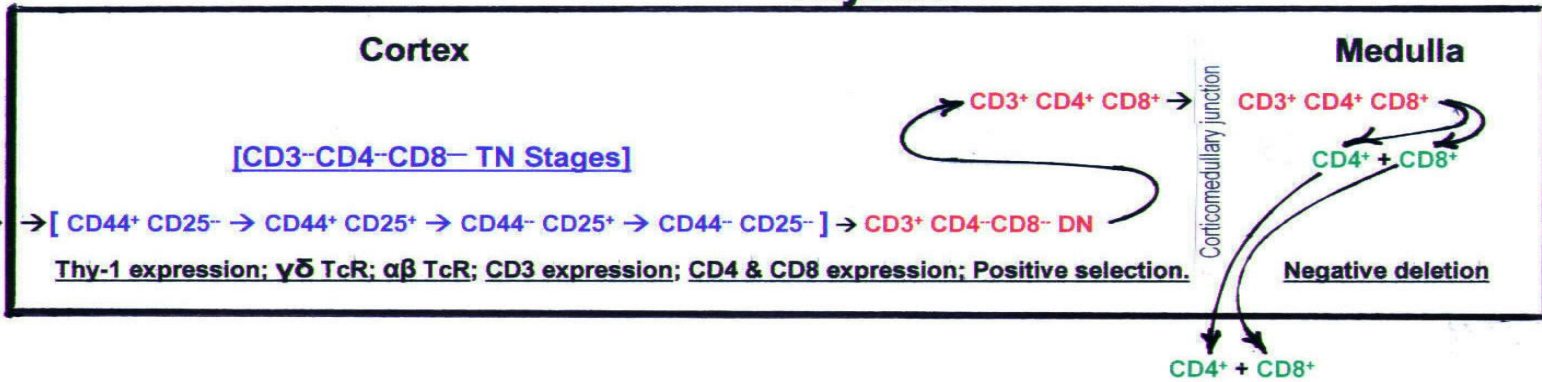

# Thymus- [After estrogen]

B

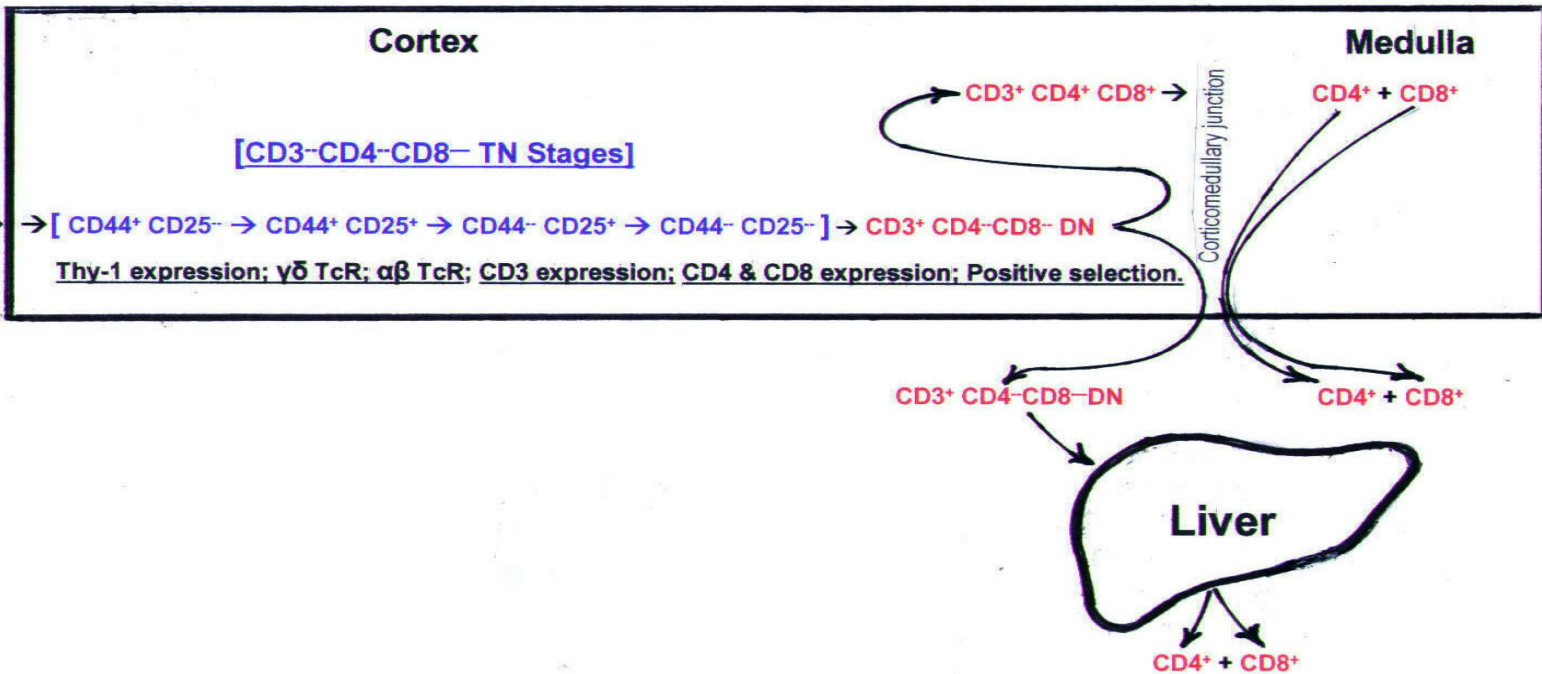

Supplement: MOESM3 [file 9568200]
